# Supplementary material for: Development and use of the PodEssential and Paeds‐PodEssential triage tools to define “essential” podiatry services. A Delphi survey, scoping review, and face validity testing study
Source: Springer Nature journal article supplement (doi:10.1186/s13047-022-00525-8), 2022-01-01

## Appendix 1: Search strategy and PRISMA flowchart

1. client\*.mp. OR
2. service user\*.mp.
3. patient\*.mp.
4. Patient Selection.mp.
5. 1 or 2 or 3 or 4
6. categor\*.mp.
7. setting.mp.
8. strateg\*.mp.
9. system\*.mp.
10. tool\*.mp.
11. Classification.mp
12. 6 or 7 or 8 or 9 or 10 or 11
13. queu\*.mp.
14. delay\*.mp.
15. waiting time\*.mp.
16. "wait time".mp.
17. waiting list\*.mp.
18. wait list\*.mp.
19. waitlist\*.mp.
20. Systems Theory.mp.
21. 13 or 14 or 15 or 16 or 17 or 18 or 19 or 20
22. priorit\*.mp.
23. triag\*.mp.
24. Health Priorities.mp.
25. Triage.mp.
26. risk.mp
27. podiatr\*.mp.
28. chiropod\*.mp.
29. foot.mp.
30. feet.mp.
31. leg.mp.
32. lower limb.mp.
33. ankle.mp
34. 27 or 28 or 29 or 30 or 31 or 32 or 33
35. 22 or 23 or 24 or 25 or 26
36. 5 and 12 and 21 and 34 and 35
37. limit 36 to yr="2000 -Current"

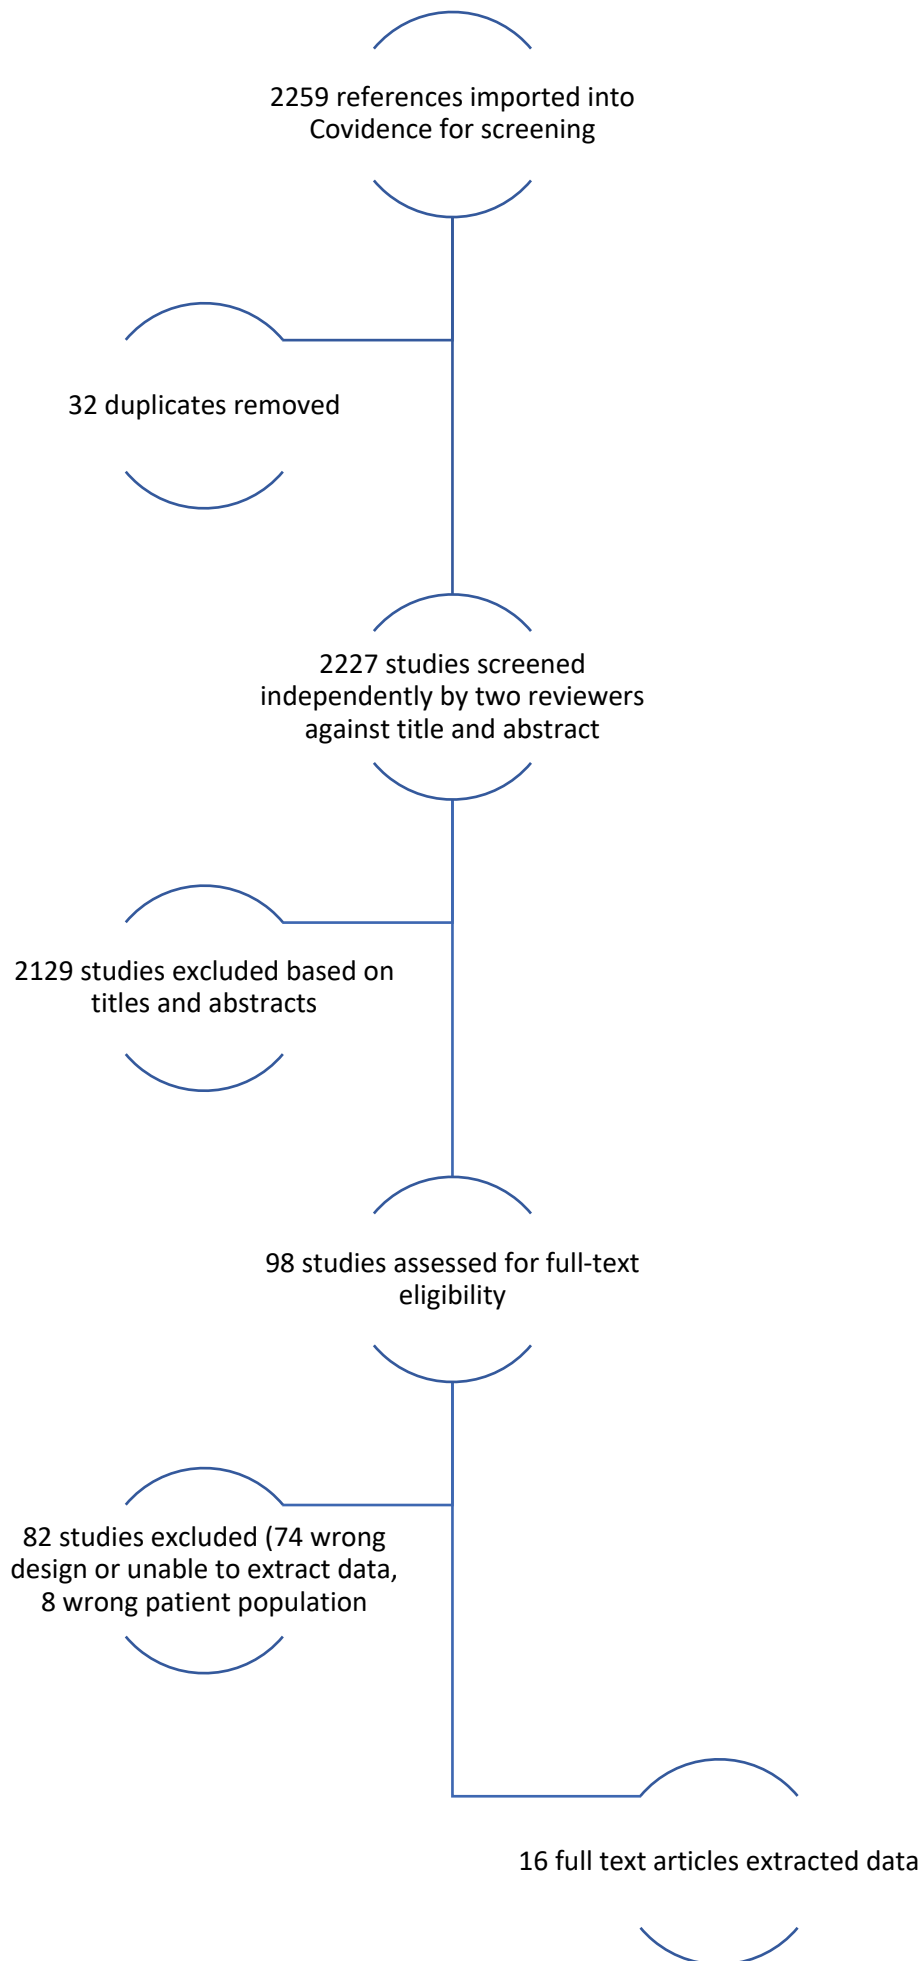

Supplement: MOESM1 [file 20202804]
